# Supplementary material for: Downregulation of Akt induces proximal tubule epithelial cell apoptosis via Foxo-1-BIM pathway in proteinuric states
Source: Research Square preprint supplement (doi:10.21203/rs.3.rs-6234375/v1), 2025-04-25

250 —  
 180 —  
 100 —  
 75 —  
 50 —  
 37 —  
 25 —  
 20 —  
 16 —  
 10 —

745 877 916 871 888 910  
 916 780  
 Saline Alb. Ctrl. Alb. Overload

Top: C  
 Bot: C

200 —  
 160 —  
 100 —  
 75 —  
 50 —  
 37 —  
 25 —  
 20 —  
 15 —  
 10 —

745 877 916 871 888 910  
 Saline Alb. Ctrl. Alb. Overload  
 β Actin

745 877 916 871 888 910  
 Mito COX I

# 3/24/17 Cytosolic Fraction Touch Exposure

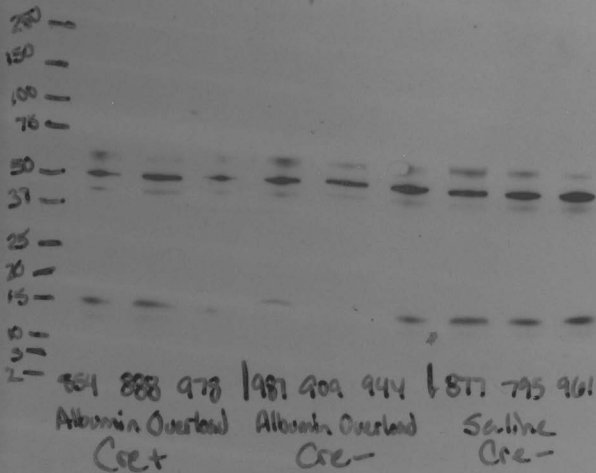

Top: B Actin (47kDa)

Bot: Cytochrome C (14kDa)

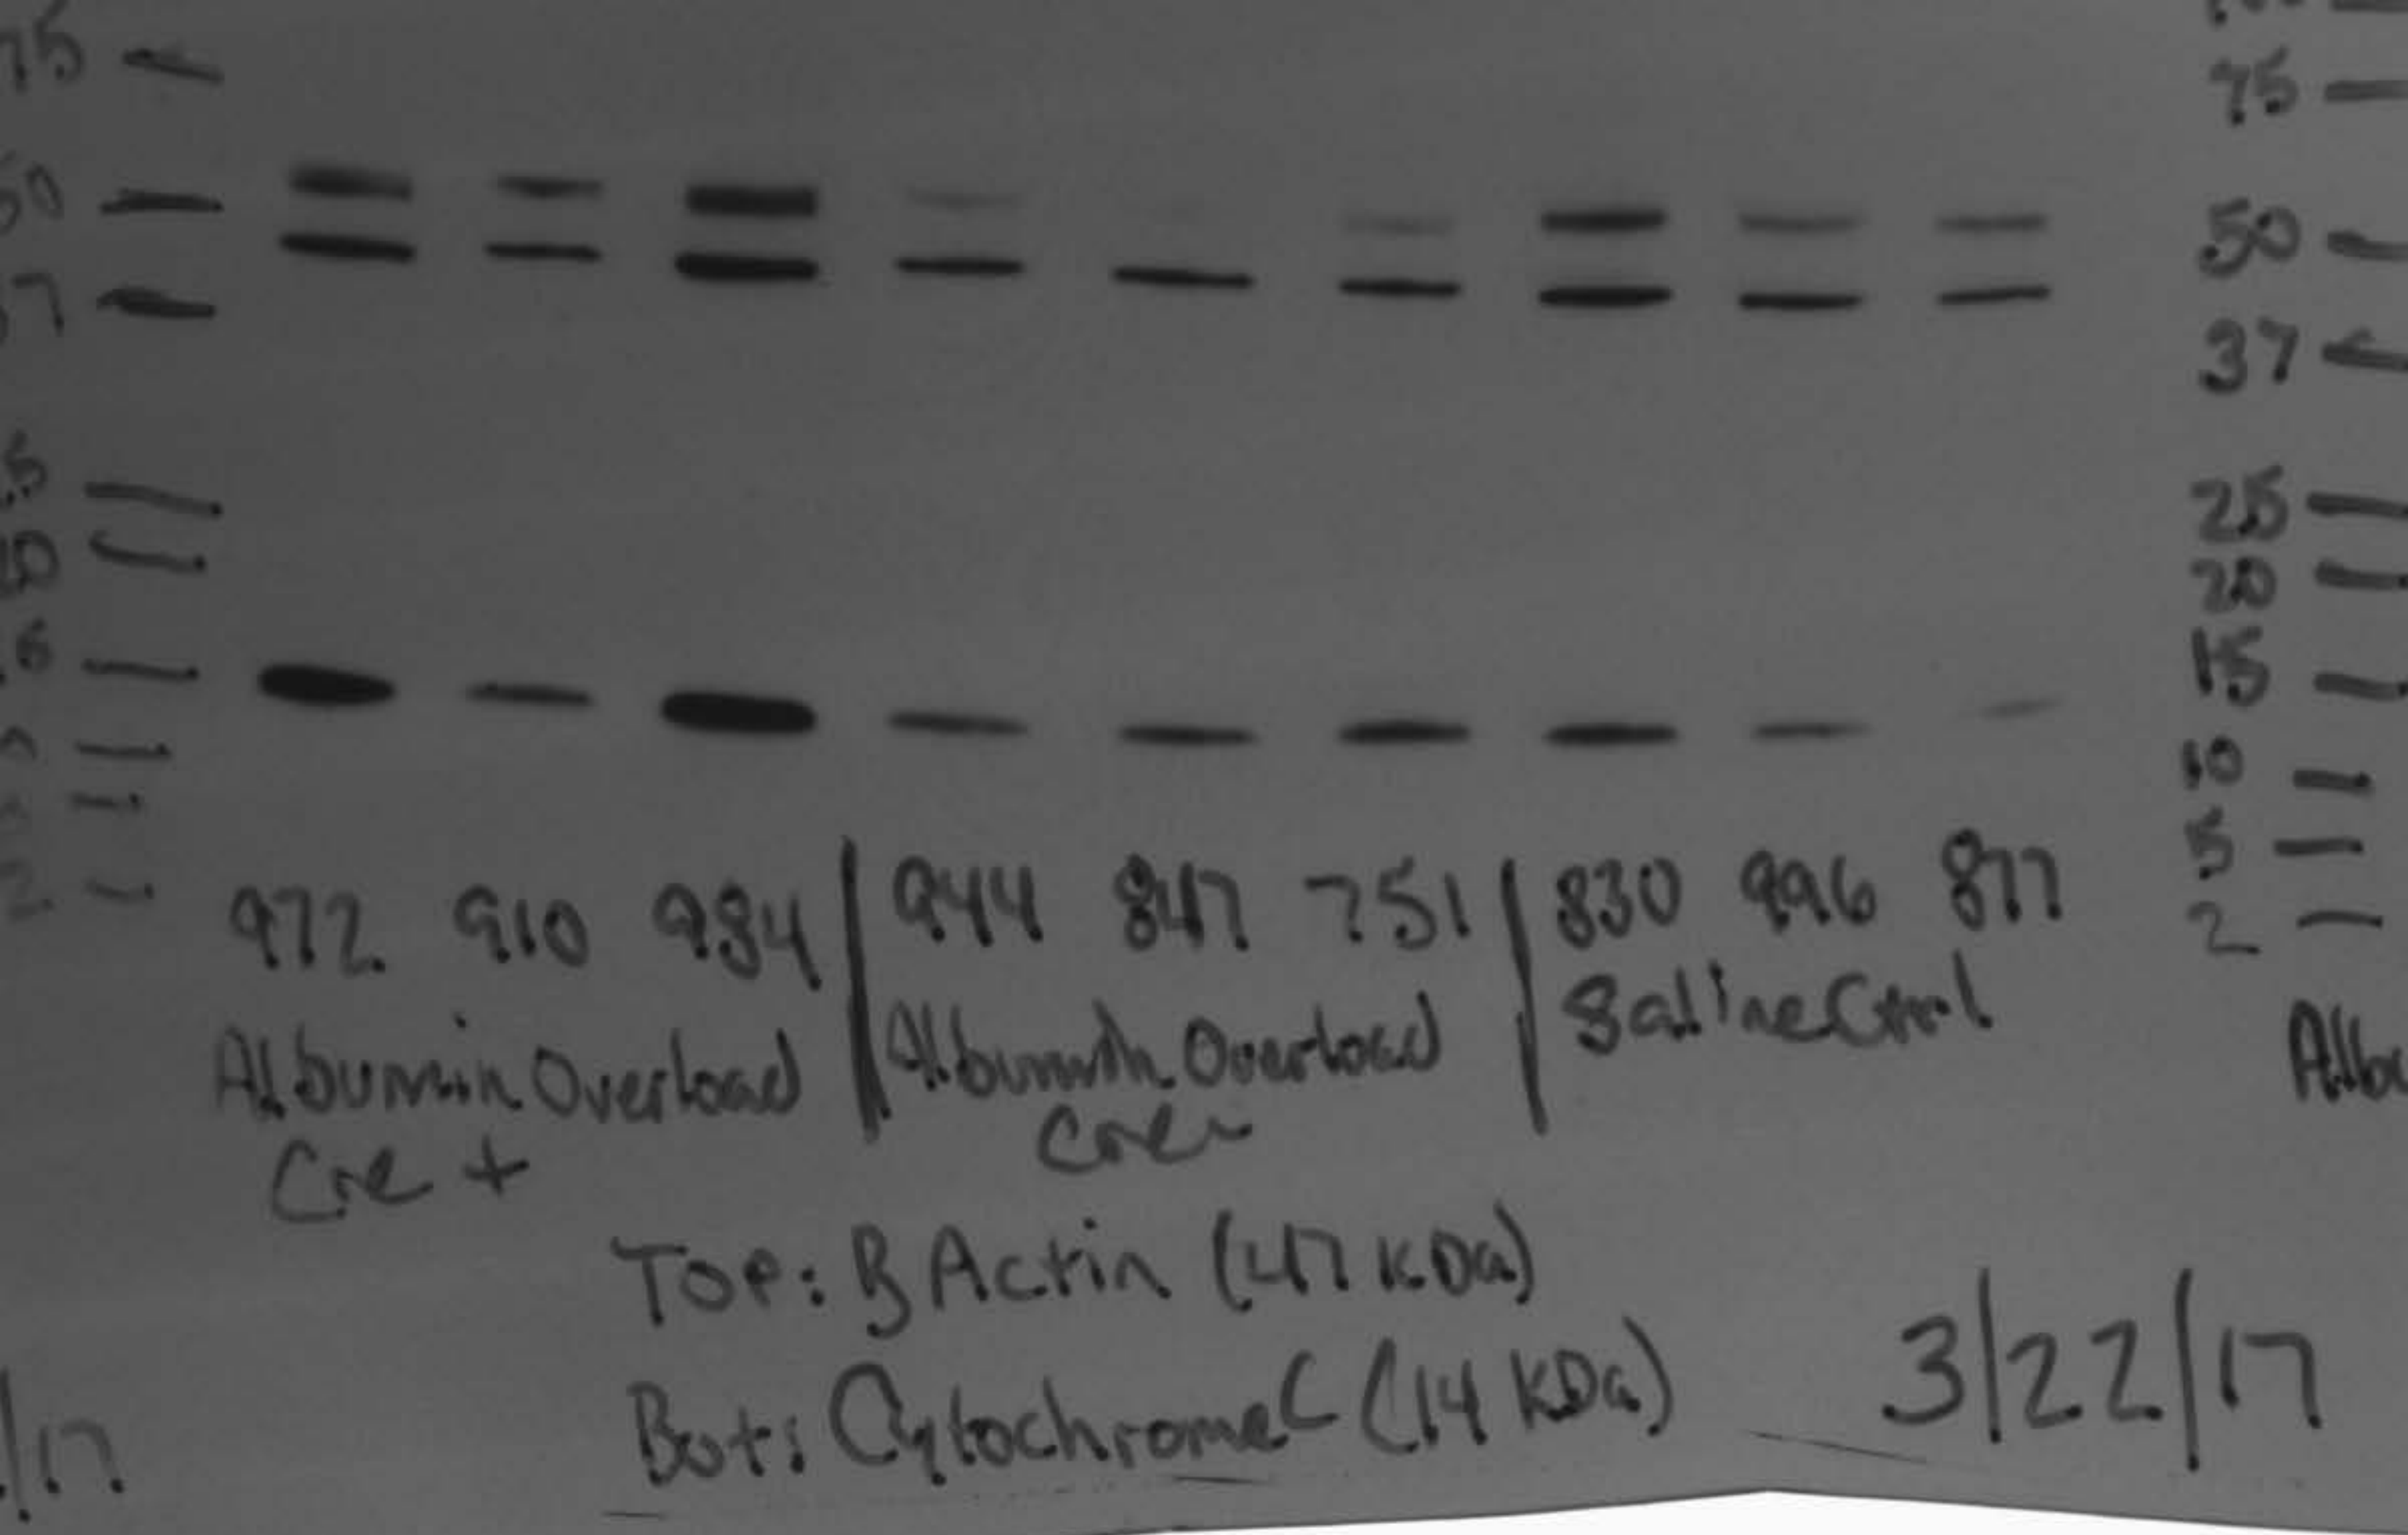

Supplement: Supplementary file 2 [file fd3e8ec60d67cacc22fcf0f9.pdf]
